# Supplementary material for: Understanding the synergistic effect of piezoelectric polarization and the extra electrons contributed by oxygen vacancies on an efficient piezo-photocatalysis CO2 reduction
Source: Royal Society of Chemistry journal article supplement (doi:10.1039/d3qi00405h), 2023-01-01
Supplement: d3qi00405h1.pdf [file d3qi00405h1.pdf]

## Supporting information

### Understanding the synergistic effect of piezoelectric polarization and extra electrons contributed by oxygen vacancies on efficient piezo-photocatalysis CO<sub>2</sub> reduction

Qijun Xu, Jingwen Jiang, Xuelin Sheng, Qi Jing, Xiaofeng Wang, Lingyan Duan\*(iD 0000-0003-3446-0112), Hong Guo\*(iD 0000-0001-5693-2980)

International Joint Research Center for Advanced Energy Materials of Yunnan Province, Yunnan Key Laboratory of Carbon Neutrality and Green Low-carbon Technologies, School of Materials and Energy, Yunnan University, Kunming 650091, China

e-mail: lingyan.duan@ynu.edu.cn, guohong@ynu.edu.cn

### S1 Experimental section

#### Materials.

Bismuth nitrate pentahydrate (Bi(NO<sub>3</sub>)<sub>3</sub>·5H<sub>2</sub>O, 99.99%), Ferric nitrate nonahydrate (Fe(NO<sub>3</sub>)<sub>3</sub>·9H<sub>2</sub>O, 99.9%), Nitric acid (HNO<sub>3</sub>, AR), Potassium hydroxide (KOH, 99.99%), Ethanol (C<sub>2</sub>H<sub>6</sub>O, AR 99.7%), Sodium borohydride (NaBH<sub>4</sub>, 99%), Others solvents, reagents and chemicals were used without further purification.

**Synthesis of BiFeO<sub>3</sub>.** First, dissolve 1.6797 g of Bi(NO<sub>3</sub>)<sub>3</sub>·5H<sub>2</sub>O and 1.4141 g of Fe(NO<sub>3</sub>)<sub>3</sub>·9H<sub>2</sub>O in 20ml, 1 mol/L dilute nitric acid solution. Use a magnetic stirrer to continuously stir the solution. After the solution is completely dissolved, add 52.5 ml, 4 mol/L KOH solution to the solution drop by drop, and the solution gradually turns into a dark brown suspension. In order to mix the solution evenly, put the solution into the ultrasonic cleaning instrument for ultrasonic treatment for 8 min, and continue to stir the solution with a magnetic stirrer for 30 min. Then pour the prepared precursor into 100 ml Teflon lining, put the Teflon lining into the reaction kettle and put it into the constant temperature drying oven. After reacting at 200 °C for 6 h, the reactor was naturally cooled to room temperature. After dismantling the reactor, remove the supernatant in the PTFE lining, wash the product with distilled water and absolute ethanol for several times, and dry it in a vacuum drying oven at 80 °C for 12

h, and finally get BiFeO<sub>3</sub> product.

**Synthesis of BiFeO<sub>3-x</sub>.** Weigh 0.5 g BiFeO<sub>3</sub> and 0.2 g NaBH<sub>4</sub> respectively, mix the two powders in a mortar and grind them for 10~30 min. After it is fully mixed, put the sample into the porcelain boat and put it in the tubular furnace, and then install the tubular furnace. Turn on the vacuum pump and vacuum the tubular furnace until the pressure gauge shows -0.1 mpa. Turn off the vacuum pump. At this time, the inside of the furnace tube is in a vacuum state. Open the argon valve, then open the air inlet of the tubular furnace, and then open the air outlet when the pressure gauge shows 0. At this time, bubbles can be seen in the conical bottle, about one bubble per second, indicating that the gas path is unobstructed. Then, close the door of the tubular furnace and set the heating parameters. The heating rate is 5 °C/min, heated to 300 °C, and kept warm for 120 min. After the program is set, start the program so that the tubular furnace begins to heat up. After the tubular furnace procedure is completed and cooled naturally to room temperature, disassemble the tubular furnace and pour the sintered powder sample onto the weighing paper. Use a beaker to measure 50 ml of absolute ethanol, and then pour the above samples into absolute ethanol to disperse for 2 h. Then, the dispersed samples are divided into two centrifuge tubes, with a calibration mass difference of 0.1 g, centrifuged at a speed of 8000 r/min for 3 min each time, washed twice with alcohol, and then washed several times with deionized water until the pH value is neutral. The purpose of this process is to wash away the excess NaBH<sub>4</sub> mixed in BiFeO<sub>3-x</sub>. Put the cleaned samples into a vacuum drying oven and dry them under vacuum for 12 h at a temperature of 60 °C. The dried sample is then ground to obtain BiFeO<sub>3-x</sub> sample.

## **S2 Characterization**

TEM images and the high-resolution images are recorded using a high-resolution transmission electron microscope (HRTEM, JEM-2010). The morphology of samples is investigated using scanning electron microscope (SEM) (AMRAY 1000B), the elements distribution is detected by SEM EDS mapping. The Powder X-ray diffraction (PXRD) patterns of the samples are obtained using a X-ray diffractometer with Copper target K $\alpha$  radiation ( $\lambda = 1.5418$  nm), scanning range (Angle  $2\theta$ ) of 10°~90°, scanning time of 0.5 s. The unpaired electrons in the atoms or molecules of the

sample to see whether vacancy phenomena are produced by Electron Paramagnetic Resonance (EPR) (A300, Bruker Daltonics, U.S.A.). Elements content is evaluated by X-ray photoelectron spectroscopy (XPS) recorded by K-Alpha+ (Thermo Fisher Scientific, U.S.A.) where the source of radiation was mono Al K $\alpha$ . The photo luminescence (PL) and time-resolved PL decay measurements are conducted on a fluorescence spectrometer (PF5301PC, Shimadzu, Japan) using a Xenon lamp (excitation at 330 nm) as a light source. UV–visible diffuse reflectance spectra (DRS) are obtained using a Shimadzu UV-2700 recording spectrophotometer.

### **S3 EPR measurements**

EPR identification of oxygen vacancies was operated at room temperature. TEMP (2,2,6,6-tetramethyl-1-piperidine) and DMPO (5, 5-dimethyl-1-pyrroline N-oxide) was used as spin-trapping reagent.

### **S4 In-situ DRIFTS analyses for CO<sub>2</sub> photoreduction**

In-situ DRIFTS (diffuse reflectance infrared Fourier transform spectra) tests were conducted on Nicolet iS50FT-IR spectrometer (Thermo Fisher, USA) equipped with a designed reaction chamber and a liquid water cooling HgCdTe (MCT) detector. The sample along with a Cu holder was put into the reaction chamber. Then the sample was purged with N<sub>2</sub> (30 mL/min) for 1 h at 100°C to blow out all the gases in the cell and adsorbed on the samples. After the reaction chamber cooling down to room temperature, the mixture of CO<sub>2</sub> (5 mL/min) and H<sub>2</sub>O vapor were introduced into the chamber for 30 min to make sure the sorption equilibrium before irradiation.

### **S5 SPV measurements**

SPV spectra were obtained based on a lock-in amplifier. The measurement systems included a lock-in amplifier, monochromatic light, a light chopper, and a sample chamber. Monochromatic light was induced from a 500w Xe lamp via a monochromator.

### **S6 EIS measurements**

For electrochemical measurements, the working electrodes were prepared as follows: 10 mg of the as-prepared photocatalyst powder was mixed with 10 $\mu$ L Nafion(5%) and 150 $\mu$ L ethanol under sonication for 1 h to produce a slurry, which was then drop-cast onto a half of indium-tin oxide (ITO) conductive glass with a fixed active area of 1.0  $\times$  2.0 cm<sup>2</sup>. The prepared electrodes were allowed to dry at room temperature for 10 h. The photoelectrochemical properties and EIS tests of the catalyst were carried

out on the Princeton Applied Research P3000A. The electrochemical performance test was carried out in an electrolytic cell of a three-electrode system. The ITO coated with photocatalyst sample was the working electrode, the Ag/AgCl (saturated KCl) electrode was used as the reference electrode, the Pt sheet is the counter electrode, and 0.1 M sodium sulfate solution was used as the electrolyte solution. All test experiments are carried out at room temperature. During the EIS test, the applied bias voltage is 0 V, and the open circuit potential frequency range is  $10^5$  Hz to  $10^{-1}$  Hz.

### **S7 Calculation method of energy band structure**

As shown in Fig. 4e, the negative slope of Mott-Schottky curve shows that BiFeO<sub>3</sub> and BiFeO<sub>3-x</sub> are P-type semiconductors. The flat band potentials ( $E_{fb}$ ) of BiFeO<sub>3</sub> and BiFeO<sub>3-x</sub> are 0.38 and 0.43 V vs. Ag/AgCl (-0.1, -0.058 and -0.08 V vs. NHE), respectively [1,2]. Subsequently, the CB of BiFeO<sub>3</sub> and BiFeO<sub>3-x</sub> are estimated to be 0.38 and 0.43 V vs. NHE, respectively. The VB of BiFeO<sub>3</sub> and BiFeO<sub>3-x</sub> can be estimated by  $E_g$  and EVB, which are 2.58 and 2.58 eV, respectively. The distance from the VB to the  $E_f$  can be determined by the VB-XPS of BiFeO<sub>3</sub> and BiFeO<sub>3-x</sub> (Fig. 4g) [3-5].

### **S8 In-situ DRIFTS analyses for CO<sub>2</sub> photoreduction**

In-situ DRIFTS (diffuse reflectance infrared Fourier transform spectra) tests were conducted on Nicolet iS50 FT-IR spectrometer (Thermo Fisher, USA) equipped with a designed reaction chamber and a liquid water cooling HgCdTe (MCT) detector. The sample along with a Cu holder was put into the reaction chamber. Then the sample was purged with N<sub>2</sub> (30 mL/min) for 1 h at 100°C to blow out all the gases in the cell and adsorbed on the samples. After the reaction chamber cooling down to room temperature, the mixture of CO<sub>2</sub> (5 mL/min) and H<sub>2</sub>O vapor were introduced into the chamber for 30 min to make sure the sorption equilibrium before irradiation.

### **S9 Measurement of piezo-photocatalysis activity**

The CO<sub>2</sub> reduction on the catalyzer in the presence of H<sub>2</sub>O was conducted in the LabSolar-IIIAG on-line catalysis analysis system (Beijing Perfectlight ). The piezo-photocatalysis CO<sub>2</sub> reduction was carried out in a 50 mL Pyrex reactor. Ultrahigh-purity CO<sub>2</sub> (99.99%) was fed continuously into the reactor at a rate of 0.1 L min<sup>-1</sup> for 2 h to remove oxygen in the water and saturate the solution. 12 mg of sample was uniformly dispersed in the mixture of 2 mL of deionized water, 22 mL acetonitrile and 6 mL triethanolamine by ultrasonication, and the temperature was kept at 25°C

constant by a running water system. The piezo-photocatalysis activity was studied using a 300 W Xe lamp with 420 nm cut-off filter as the visible light source and a 100 Hz ultrasonic instrument. The gas product (1  $\mu\text{L}$ , taken from the reactor) was analyzed using a gas chromatograph (GC-950) equipped with a FID and a TCD detector. Only the products of CO and  $\text{CH}_4$  were detected.

**Tab. S1** The calculated  $E_g$ , EVB and ECB of  $\text{BiFeO}_3$  and  $\text{BiFeO}_{3-x}$  samples.

|                      | $E_{CB}/\text{eV}$ | $E_g/\text{eV}$ | $E_{VB}/\text{eV}$ |
|----------------------|--------------------|-----------------|--------------------|
| $\text{BiFeO}_3$     | 0.38               | 2.2             | 2.58               |
| $\text{BiFeO}_{3-x}$ | 0.43               | 2.15            | 2.58               |

**Tab. S2** Comparison of catalytic activity between  $\text{BiFeO}_{3-x}$  and reported catalysts for  $\text{CO}_2$  reduction.

| catalyzer                                            | Type of catalysis       | $\text{CH}_4$                | CO                            | Ref       |
|------------------------------------------------------|-------------------------|------------------------------|-------------------------------|-----------|
| $\text{BiFeO}_3$                                     | Piezo-photocatalysis    | 9.1 ( $\mu\text{mol/g}$ )    | 53.6 ( $\mu\text{mol/g}$ )    | This work |
| $\text{BiFeO}_{3-x}$                                 | Piezo-photocatalysis    | 32.8 ( $\mu\text{mol/g}$ )   | 142.6 ( $\mu\text{mol/g}$ )   | This work |
| $\text{BaTiO}_3$                                     | Piezoelectric catalysis | /                            | 63.3 ( $\mu\text{mol/g}$ )    | [6]       |
| P25- $\text{TiO}_2$                                  | Photocatalysis          | /                            | 7.1 ( $\mu\text{mol/g/h}$ )   | [7]       |
| $\text{Ti}_2\text{O}_3 / \text{TiO}_2$               | Photocatalysis          | 0.65 ( $\mu\text{mol/g/h}$ ) | 2.64 ( $\mu\text{mol/g/h}$ )  | [8]       |
| CdS-P25/ZIF-67                                       | Photocatalysis          | 1.58 ( $\mu\text{mol/h}$ )   | 1.49 ( $\mu\text{mol/h}$ )    | [9]       |
| P-CeO <sub>2</sub> /g-C <sub>3</sub> N <sub>4</sub>  | Photocatalysis          | /                            | 0.523 ( $\mu\text{mol/g/h}$ ) | [10]      |
| $\text{Ti}_3\text{C}_2/\text{Bi}_2\text{WO}_6$ 2D/2D | Photocatalysis          | 1.78 ( $\mu\text{mol/g/h}$ ) | /                             | [11]      |
| $\text{TiO}_2/\text{GDY}$                            | Photocatalysis          | 2.1 ( $\mu\text{mol/g/h}$ )  | 14.5 ( $\mu\text{mol/g/h}$ )  | [12]      |
| Fe/PSs                                               | Photocatalysis          | /                            | 16 ( $\mu\text{mol/g}$ )      | [13]      |

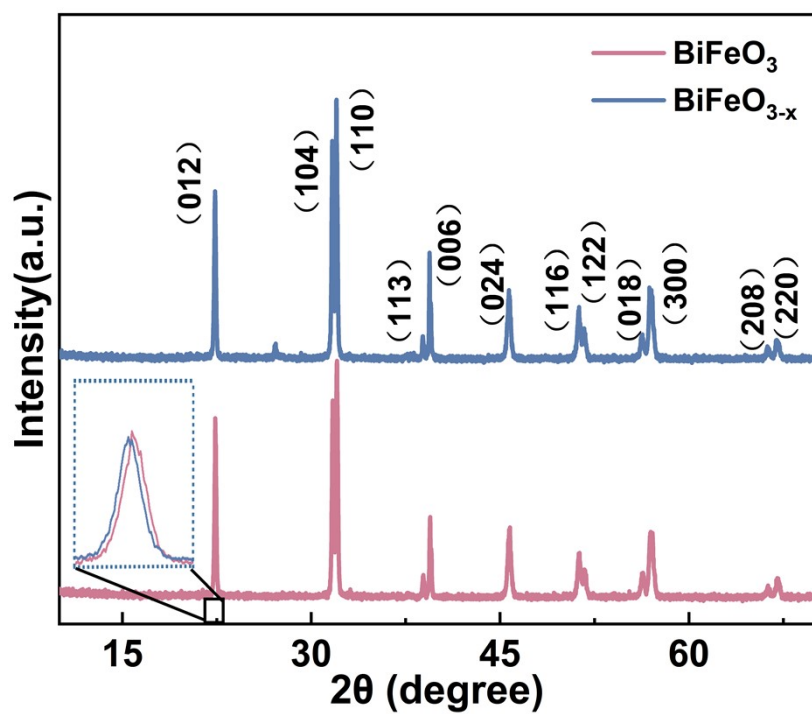

Fig. S1. XRD patterns of BiFeO<sub>3</sub> and BiFeO<sub>3-x</sub>.

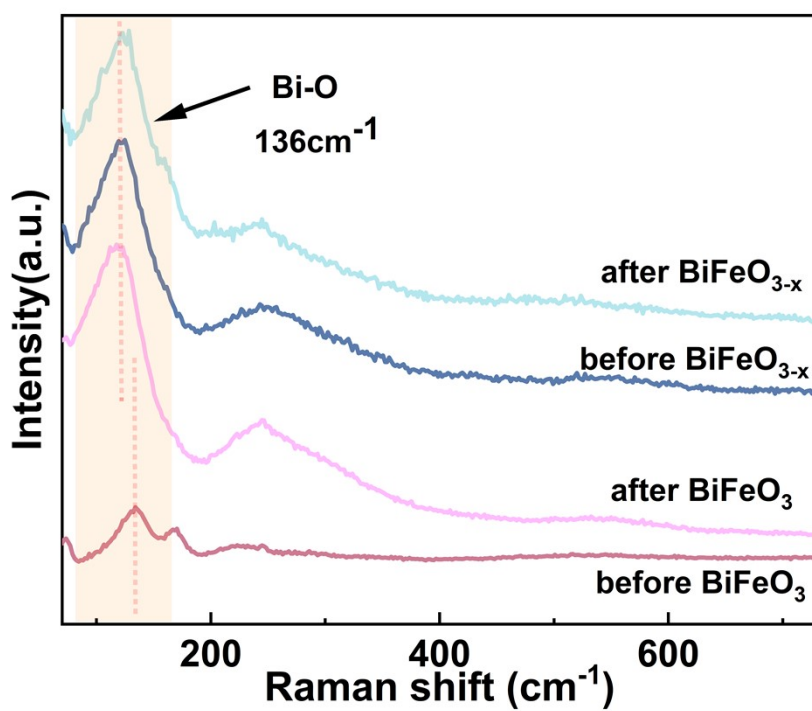

Fig. S2. Raman spectra of before and after piezo-photocatalysis for BiFeO<sub>3</sub> and BiFeO<sub>3-x</sub>.

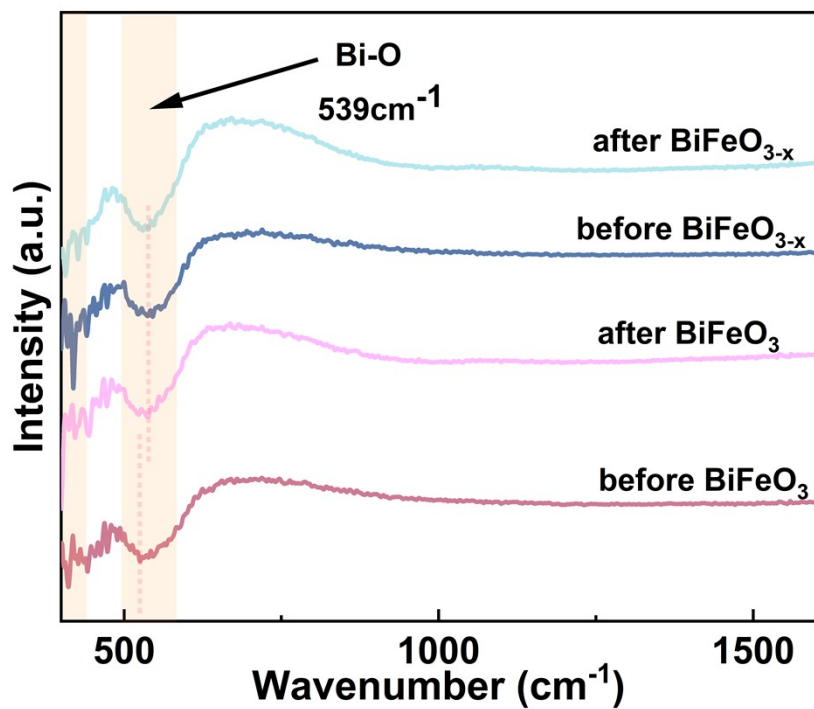

Fig. S3. FT-IR pattern of before and after piezo-photocatalysis for  $\text{BiFeO}_3$  and  $\text{BiFeO}_{3-x}$ .

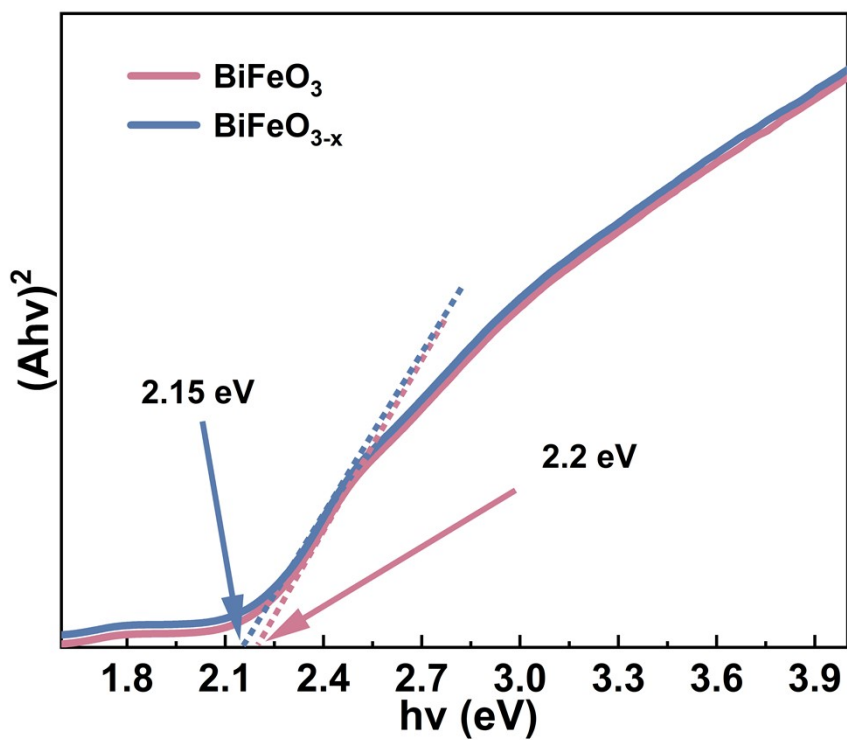

Fig. S4. The band gap width of  $\text{BiFeO}_3$  and  $\text{BiFeO}_{3-x}$  catalysts.

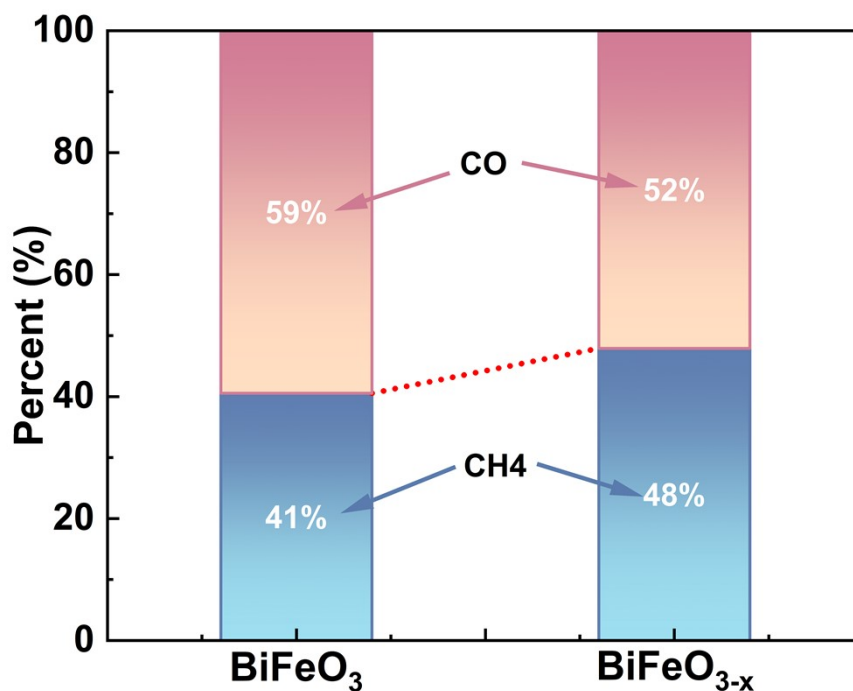

**Fig. S5.** The selectivity of BiFeO<sub>3</sub> and BiFeO<sub>3-x</sub> catalysts for CO and CH<sub>4</sub> at 9 h of piezo-photocatalysis.

Product selectivity is one of the important parameters for reflecting piezo-photocatalysts performance for CO<sub>2</sub> reduction. After discussion, we calculated the selectivity of the product CO and CH<sub>4</sub> according to the following equation [14-17].

$$\text{Selectivity for CO} = \frac{2R(\text{CO})}{8R(\text{CH}_4) + 2R(\text{CO})} \times 100\%$$

$$\text{Selectivity for CH}_4 = \frac{8R(\text{CH}_4)}{8R(\text{CH}_4) + 2R(\text{CO})} \times 100\%$$

Where R(CO) and R(CH<sub>4</sub>) are the yields of reactively-formed CO and CH<sub>4</sub> respectively. As can be seen from the calculation results in **Fig. S5**, the introduction of oxygen vacancies improves the product selectivity of BiFeO<sub>3</sub> for the piezo-photocatalysis reduction of CO<sub>2</sub> to CH<sub>4</sub>. The selectivity of BiFeO<sub>3-x</sub> for CH<sub>4</sub> is up to 48%.



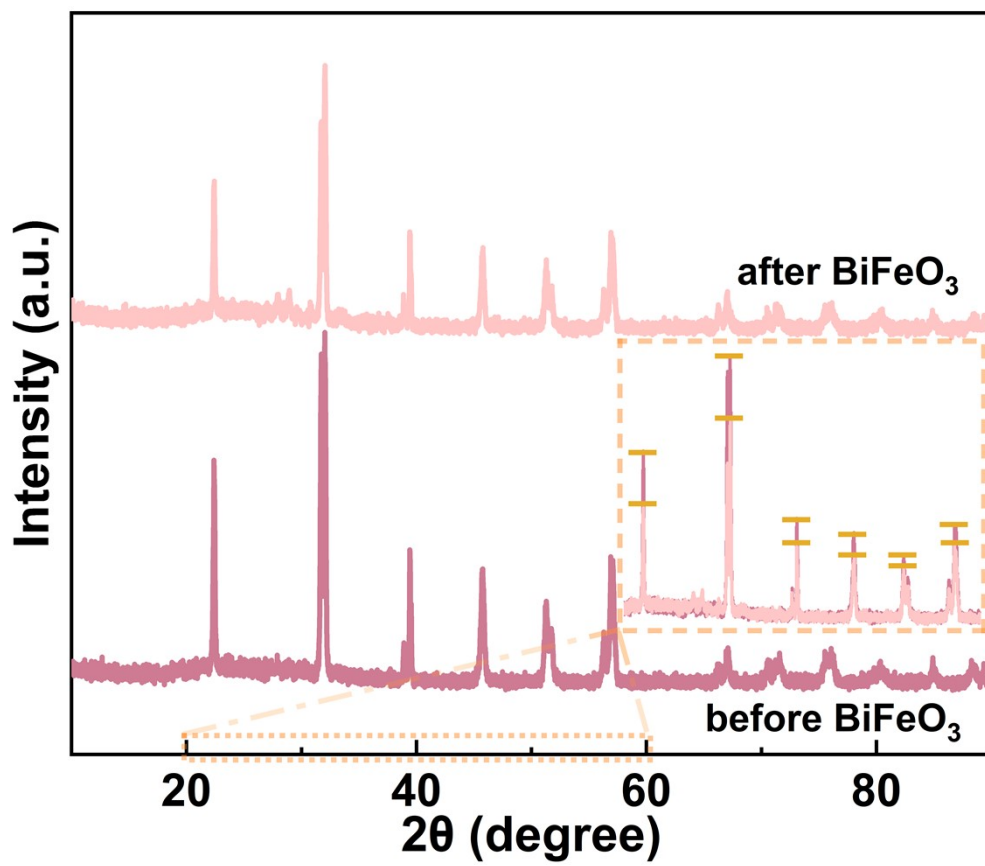

Fig. S6. The XRD patterns of before and after piezo-photocatalysis for BiFeO<sub>3</sub>.

## References

- 1 K. Chen, T.-T. Jiang, T.-H. Liu, J. Yu, S. Zhou, A. Ali, S.-H. Wang, Y. Liu, L.-X. Zhu, X.-L. Xu, Zn Dopants Synergistic Oxygen Vacancy Boosts Ultrathin CoO Layer for CO<sub>2</sub> Photoreduction, *Adv. Funct. Mater.*, 2022, **32**, 2109336.
- 2 Z.-R. Miao, Q.-L. Wang, Y.-F. Zhang, L.-P. Meng, X.-X. Wang, In situ construction of S-scheme AgBr/BiOBr heterojunction with surface oxygen vacancy for boosting photocatalytic CO<sub>2</sub> reduction with H<sub>2</sub>O, *Appl. Catal. B: Envir.*, 2022, **301**, 120802.
- 3 A. Hezam, K. Namratha, Q.-A. Drmosh, D. Ponnamma, J.-W. Wang, S. Prasad, M. Ahamed, C. Cheng, and K. Byrappa, CeO<sub>2</sub> Nanostructures Enriched with Oxygen Vacancies for Photocatalytic CO<sub>2</sub> Reduction, *ACS Appl. Nano Mater.*, 2019, **3**, 138-148.
- 4 Y. Huo, J.-F. Zhang, K. Dai, C.-H. Liang, Amine-Modified S-Scheme Porous g-C<sub>3</sub>N<sub>4</sub>/CdSe–Diethylenetriamine Composite with Enhanced Photocatalytic CO<sub>2</sub> Reduction Activity, *ACS Appl. Energy Mater.*, 2021, **4**, 956-968.
- 5 F.-Q. Zhang, L. Zhao, H. Chen, Y.-H. He, P. Tian, X.-H. Zeng, Synthesis of mesoporous Fe/h-CeO<sub>2</sub> hollow micro-spheres with enhanced visible light photocatalytic activity, *Mater. Res. Express.*, 2019, **6**, 095516.
- 6 J.-P. Ma, S.-J. Jing, Y. Wang, X. Liu, L.-Y. Gan, C. Wang, J.-Y. Dai, X.-D. Han, X.-Y. Zhou, Piezo-electrocatalysis for CO<sub>2</sub> reduction driven by vibration, *Adv. Energy Mater.*, 2022, **12**, 2200253.
- 7 Z. Mo, X.-W. Zhu, Z.-F. Jiang, Y.-H. Song, D.-B. Liu, H.-P. Li, X.-F. Yang, Y.-B. She, Y.-C. Lei, S.-Q. Yuan, H.-M. Li, L. Song, Q.-Y. Yan, H. Xu, Porous nitrogen-rich g-C<sub>3</sub>N<sub>4</sub> nanotubes for efficient photocatalytic CO<sub>2</sub> reduction, *Appl. Catal. B Environ.*, 2019, **256**, 117854.
- 8 M. Xu, A. Zada, R. Yan, H.-N. Li, N. Sun, Y. Qu, Ti<sub>2</sub>O<sub>3</sub>/TiO<sub>2</sub> heterophase junctions with enhanced charge separation and spatially separated active sites for photocatalytic CO<sub>2</sub> reduction. *Phys Chem Chem Phys.*, 2020, **22**, 4526-4532.
- 9 L. Wang, Z.-T. Zhang, Q. Han, Y. Liu, J.-B. Zhong, J.-F. Chen, J.-W. Huang, H.-D. She, Q.-Z. Wang, Preparation of CdS-P25/ZIF-67 composite material and its photocatalytic CO<sub>2</sub> reduction performance. *Appl. Surf. Sci.*, 2022, **584**, 152645.
- 10 W. Li, L. Jin, F. Gao, H. Wan, Y. Pu, X. Wei, C. Chen, W. Zou, C. Zhu, L. Dong, Advantageous roles of phosphate decorated octahedral CeO<sub>2</sub>{111}/g-C<sub>3</sub>N<sub>4</sub> in boosting photocatalytic CO<sub>2</sub> reduction: charge transfer bridge and lewis basic site,

- Appl. Catal. B Environ., 2021, **294**, 120257.
- 11 S.-W. Cao, B.-J. Shen, T. Tong, J.-W. Fu, J.-G. Yu, 2D/2D heterojunction of ultrathin MXene/Bi<sub>2</sub>WO<sub>6</sub> nanosheets for improved photocatalytic CO<sub>2</sub> reduction, Adv. Funct. Mater., 2018, **28**, 1800136.
  - 12 F.-Y. Xu, K. Meng, B.-C. Zhu, H.-B. Liu, J.-S. Xu, and J.-G. Yu, Graphdiyne: A New Photocatalytic CO<sub>2</sub> Reduction Cocatalyst, Adv. Funct. Mater., 2019, **29**, 1904256.
  - 13 Q.-Q. Lei, H.-Q. Yuan, J.-H. Du, M. Ming, S. Yang, Y. Chen, J.-X. Lei, Z.-J. Han, Photocatalytic CO<sub>2</sub> reduction with aminoanthraquinone organic dyes, Nat. Commun., 2023, **14**, 1087.
  - 14 Y. Zhang, W. Chen, M. Zhou, G. Miao, Y. Liu, Efficient Photocatalytic CO<sub>2</sub> Reduction by the Construction of Ti<sub>3</sub>C<sub>2</sub>/ CsPbBr<sub>3</sub> QD Composites, ACS Appl. Energy Mater., 2021, **4**, 9154-9165.
  - 15 S. Kumar, M. Isaacs, R. Trofimovaite, L. Durndell, C. Parlett, R. Douthwaite, B. Coulson, M. Cockett, K. Wilson, A. Lee, P25@CoAl layered double hydroxide heterojunction nanocomposites for CO<sub>2</sub> photocatalytic reduction, Appl. Catal. B Environ., 2017, **209**, 394-404.
  - 16 R. Bhosale, S. Jain, C. Vinod, S. Kumar, S. Ogale, Direct Z-Scheme g-C<sub>3</sub>N<sub>4</sub>/FeWO<sub>4</sub> Nanocomposite for Enhanced and Selective Photocatalytic CO<sub>2</sub> Reduction under Visible Light, ACS Appl. Mater. Interfaces., 2019, **11**, 6174-6183.
  - 17 S. Tonda, S. Kumar, M. Bhardwaj, P. Yadav, S. Ogale, g-C<sub>3</sub>N<sub>4</sub>/NiAl-LDH 2D/2D Hybrid Heterojunction for High-Performance Photocatalytic Reduction of CO<sub>2</sub> into Renewable Fuels, ACS Appl. Mater. Interfaces., 2018, **10**, 2667-2678.
